# Supplementary material for: The Small RNA RyhB Is a Regulator of Cytochrome Expression in Shewanella oneidensis
Source: PubMed Central journal article supplement (PMC5826389; doi:10.3389/fmicb.2018.00268), 2018-02-21
Supplement: Table3.pdf [file Table3.pdf]

## *Supplementary Material*

### **The small RNA RyhB is a regulator of cytochrome expression in *Shewanella oneidensis***

**Karin L. Meibom<sup>\*</sup>, Elena M. Cabello, Rizlan Bernier-Latmani**

**\* Correspondence:** Karin L. Meibom: [karin.meibom@epfl.ch](mailto:karin.meibom@epfl.ch)

**Supplementary Table 3.** Genes expressed at higher level in the  $\Delta fur$  mutant relative to the wild-type strain with a  $\log_2 R > 1$  and adjusted p-values  $< 0.05$ .

| <b>Locus</b> | <b>Annotation</b>                                      | <b><math>\log_2 R</math></b> | <b>adj.P.Val</b> |
|--------------|--------------------------------------------------------|------------------------------|------------------|
| SO_0139      | Ferritin Ftn                                           | 1.09                         | 1.40E-04         |
| SO_0154      | Inner membrane protein of unknown function DUF893      | 1.33                         | 1.44E-06         |
| SO_0291      | Predicted periplasmic protein                          | 1.09                         | 1.61E-05         |
| SO_0296      | 10 TMS drug/metabolite efflux pump (DME) family        | 1.84                         | 8.71E-07         |
| SO_0313      | Putrescine:ornithine antiporter PotE                   | 1.00                         | 1.06E-02         |
| SO_0334      | Protein of unknown function                            | 1.49                         | 5.06E-05         |
| SO_0447      | Iron-regulated inner membrane protein                  | 1.40                         | 1.47E-05         |
| SO_0448      | Iron-regulated inner membrane protein                  | 1.47                         | 9.45E-06         |
| SO_0449      | Iron-regulated inner membrane protein                  | 1.80                         | 6.34E-08         |
| SO_0458      | Hypothetical protein                                   | 2.55                         | 1.30E-05         |
| SO_0541      | RNA-metabolizing metallo-beta-lactamase family protein | 1.05                         | 1.21E-05         |
| SO_0552      | Predicted periplasmic protein                          | 1.84                         | 6.71E-06         |
| SO_0583      | Bacterioferritin-associated ferredoxin Bfd             | 1.65                         | 4.81E-04         |
| SO_0643      | Mu phage transposase OrfA TnpA_MuSo1a                  | 1.27                         | 3.42E-03         |
| SO_0644      | Mu phage transposase OrfB TnpA_MuSo1b                  | 2.72                         | 2.25E-04         |
| SO_0645      | Mu phage uncharacterized protein                       | 2.19                         | 3.67E-04         |
| SO_0648      | Mu phage protein of unknown function                   | 2.21                         | 9.18E-05         |

## Supplementary Material

|         |                                                                                  |      |          |
|---------|----------------------------------------------------------------------------------|------|----------|
| SO_0649 | Mu phage uncharacterized protein                                                 | 2.29 | 4.57E-05 |
| SO_0674 | Mu phage peptidase                                                               | 3.62 | 4.71E-05 |
| SO_0675 | Mu phage major head subunit                                                      | 4.58 | 9.29E-06 |
| SO_0690 | Mu phage DNA adenine methylase Dam family                                        | 2.00 | 3.10E-04 |
| SO_0703 | Chaperonin GroES                                                                 | 1.04 | 3.56E-02 |
| SO_0704 | Chaperonin GroEL                                                                 | 1.27 | 1.56E-02 |
| SO_0715 | Sulfite dehydrogenase molybdopterin-binding subunit SorA                         | 3.13 | 8.62E-05 |
| SO_0725 | Bifunctional catalase/oxidase HPI KatG                                           | 1.03 | 2.83E-04 |
| SO_0742 | ABC-type Fe <sup>3+</sup> uptake system ATPase component FbpC                    | 1.33 | 1.83E-05 |
| SO_0743 | ABC-type Fe <sup>3+</sup> uptake system permease component FbpB                  | 1.06 | 1.98E-04 |
| SO_0744 | ABC-type Fe <sup>3+</sup> uptake system substrate-binding component FbpA         | 1.45 | 2.75E-05 |
| SO_0748 | Hypothetical protein                                                             | 1.36 | 3.34E-05 |
| SO_0762 | Isochorismate hydrolase family protein                                           | 1.45 | 2.30E-05 |
| SO_0797 | Periplasmic thioredoxin-family protein                                           | 3.50 | 1.62E-06 |
| SO_0798 | TonB-dependent receptor                                                          | 4.37 | 3.98E-09 |
| SO_0799 | Protein of unknown function                                                      | 1.34 | 1.61E-05 |
| SO_0809 | Periplasmic azurin Azu                                                           | 3.04 | 7.78E-07 |
| SO_0820 | ABC-type macrolide export systemMFP component MacA                               | 1.12 | 3.12E-05 |
| SO_0855 | Hydroxyneurosporene synthase AttH                                                | 1.06 | 4.34E-06 |
| SO_0856 | ABC-type export system permease component AttFG                                  | 1.01 | 1.26E-05 |
| SO_0857 | ABC-type export system ATPase component AttE                                     | 1.19 | 2.54E-05 |
| SO_0860 | Two component signal transduction system response regulator with HD domain       | 1.05 | 3.89E-05 |
| SO_0895 | Pirin family protein                                                             | 1.32 | 2.16E-06 |
| SO_0916 | Bifunctional MarR family transcriptional regulator/acteyltransferase GNAT family | 1.39 | 8.88E-08 |
| SO_0956 | Alkyl hydroperoxide reductase flavoprotein component AhpF                        | 1.12 | 4.15E-02 |
| SO_0958 | Alkyl hydroperoxide reductase peroxiredoxin component AhpC                       | 1.45 | 6.52E-04 |
| SO_1114 | DNA polymerase IV                                                                | 1.78 | 2.24E-08 |
| SO_1188 | Inner membrane protein with PepSY TM helix                                       | 2.00 | 4.21E-06 |
| SO_1189 | Putative periplasmic protein of unknown function                                 | 2.31 | 1.30E-09 |
| SO_1190 | Putative periplasmic CbiK superfamily protein                                    | 2.48 | 2.05E-09 |
| SO_1245 | Putative arginine uptake porter ArgW                                             | 1.32 | 7.52E-05 |
| SO_1397 | Cytosine deaminase                                                               | 1.25 | 6.36E-06 |
| SO_1482 | TonB-dependent receptor                                                          | 5.22 | 1.27E-08 |
| SO_1483 | Malate synthase AceB                                                             | 2.65 | 1.16E-08 |
| SO_1484 | Isocitrate lyase AceA                                                            | 2.68 | 2.43E-07 |
| SO_1532 | Predicted periplasmic protein                                                    | 1.55 | 3.32E-04 |

|         |                                                                                   |      |          |
|---------|-----------------------------------------------------------------------------------|------|----------|
| SO_1571 | Bifunctional DNA-binding protein / oxidoreductase                                 | 1.23 | 1.02E-04 |
| SO_1576 | GSH-dependent disulfide-bond oxidoreductase                                       | 1.00 | 7.02E-07 |
| SO_1580 | Hemoglobin/transferrin/lactoferrin receptor protein                               | 4.15 | 3.44E-10 |
| SO_1655 | 3'(2'),5'-bisphosphate nucleotidase CysQ                                          | 1.15 | 8.21E-04 |
| SO_1656 | D-hexose 6-phosphotransferase HexA                                                | 1.02 | 1.16E-03 |
| SO_1666 | Phenylalanine-4-hydroxylase PhhA                                                  | 1.23 | 2.64E-05 |
| SO_1667 | 4a-hydroxytetrahydrobiopterin dehydratase PhhB                                    | 1.08 | 9.29E-06 |
| SO_1698 | Autocatalytic aspartic peptidase                                                  | 1.21 | 9.94E-05 |
| SO_1699 | Transmembrane transcriptional regulator                                           | 1.47 | 2.86E-06 |
| SO_1700 | Putative lipoprotein                                                              | 1.13 | 3.31E-04 |
| SO_1751 | ABC-type transport system bifunctional permease and peptidase M1 family component | 1.03 | 1.53E-04 |
| SO_1755 | phosphoglucomutase/phosphomannomutase family protein                              | 2.23 | 7.13E-09 |
| SO_1756 | Glyoxalase family protein                                                         | 2.45 | 1.10E-07 |
| SO_1757 | Transcription activator-like effector binding domain protein                      | 2.26 | 5.55E-07 |
| SO_1758 | Transcriptional repressor DeoR family                                             | 1.44 | 1.76E-06 |
| SO_1784 | Ferrous iron transport protein B FeoB                                             | 1.19 | 3.77E-07 |
| SO_1787 | Inner membrane protein of unknown function                                        | 1.26 | 3.72E-04 |
| SO_1855 | Ribosome modulation factor                                                        | 2.70 | 3.69E-09 |
| SO_1881 | Membrane fusion protein, multidrug efflux system                                  | 2.23 | 6.21E-09 |
| SO_1882 | K18138 multidrug efflux pump                                                      | 1.64 | 2.78E-07 |
| SO_1962 | 4-hydroxyphenylpyruvate dioxygenase HppD                                          | 2.30 | 3.18E-05 |
| SO_1963 | Homogentisate 1,2-dioxygenase HmgA                                                | 2.21 | 9.45E-06 |
| SO_1967 | Predicted membrane protein                                                        | 1.31 | 1.14E-07 |
| SO_2016 | Heat shock chaperone HtpG                                                         | 1.06 | 4.86E-02 |
| SO_2017 | Heat shock response protein                                                       | 1.38 | 1.56E-02 |
| SO_2045 | Cation efflux protein CDF family                                                  | 1.15 | 6.00E-06 |
| SO_2228 | CBS domain containing protein                                                     | 1.21 | 4.05E-06 |
| SO_2280 | Drug:H <sup>+</sup> antiporter DHA1 family                                        | 1.69 | 7.56E-08 |
| SO_2367 | Pseudogene                                                                        | 2.46 | 2.40E-07 |
| SO_2426 | Two-component system, OmpR family, response regulator                             | 2.96 | 7.56E-08 |
| SO_2664 | Mu phage uncharacterized protein                                                  | 1.13 | 4.15E-03 |
| SO_2666 | Mu phage uncharacterized protein                                                  | 1.19 | 1.40E-03 |
| SO_2667 | Mu phage host gene modulation protein GemA                                        | 1.28 | 4.83E-04 |
| SO_2768 | Acyl-CoA dehydrogenase                                                            | 1.52 | 1.38E-05 |
| SO_2841 | Hypothetical protein                                                              | 2.09 | 8.71E-07 |
| SO_2882 | Serine protein kinase PrkA                                                        | 1.27 | 3.56E-06 |
| SO_2883 | Protein of unknown function                                                       | 1.09 | 1.37E-04 |

## Supplementary Material

|         |                                                          |      |          |
|---------|----------------------------------------------------------|------|----------|
| SO_2884 | SpoVR family protein                                     | 1.33 | 3.24E-06 |
| SO_2893 | Base-induced periplasmic protein YceI                    | 1.08 | 5.22E-06 |
| SO_2939 | Lambda phage uncharacterized protein                     | 2.31 | 1.49E-05 |
| SO_2940 | Lambda phage tail fiber protein J                        | 3.82 | 1.05E-06 |
| SO_2941 | Lambda phage tail assembly protein I                     | 4.99 | 3.41E-06 |
| SO_2943 | Pseudogene                                               | 2.52 | 3.41E-05 |
| SO_2944 | Lambda phage structural protein                          | 3.41 | 1.05E-06 |
| SO_2945 | Lambda phage tail fiber protein                          | 4.66 | 4.26E-07 |
| SO_2946 | Lambda phage protein with carbohydrate-binding module    | 4.75 | 3.88E-07 |
| SO_2947 | Lambda phage protein of known function                   | 4.71 | 1.71E-06 |
| SO_2948 | Lambda phage tail assembly protein K                     | 2.84 | 2.36E-05 |
| SO_2949 | Lambda phage minor tail protein L                        | 2.19 | 1.02E-05 |
| SO_2950 | Lambda phage uncharacterized protein                     | 2.23 | 1.04E-05 |
| SO_2951 | Lambda phage protein of known function                   | 2.56 | 3.33E-05 |
| SO_2953 | Lambda phage tail length tape measure protein H          | 4.49 | 2.46E-06 |
| SO_2954 | Lambda phage uncharacterized protein                     | 4.81 | 1.50E-06 |
| SO_2955 | Lambda phage minor tail protein G                        | 4.69 | 6.21E-06 |
| SO_2956 | Lambda phage major tail protein V                        | 4.55 | 1.11E-06 |
| SO_2957 | Lambda phage protein of unknown function                 | 4.41 | 1.35E-05 |
| SO_2958 | Lambda phage protein HK97-gp10 family                    | 4.39 | 7.94E-06 |
| SO_2960 | Lambda phage phage head-tail joining protein             | 4.21 | 6.19E-06 |
| SO_2961 | Lambda phage head-tail connector protein HK97-gp6 family | 4.26 | 5.71E-06 |
| SO_2962 | Lambda phage helical domain protein                      | 4.51 | 7.02E-07 |
| SO_2963 | Lambda phage major capsid protein                        | 4.82 | 1.29E-06 |
| SO_2964 | Lambda phage head maturation protease                    | 5.04 | 1.16E-06 |
| SO_2965 | Lambda phage portal protein B                            | 4.59 | 3.78E-06 |
| SO_2968 | Lambda phage terminase A                                 | 4.77 | 1.56E-05 |
| SO_2969 | Lambda phage endonuclease HNH family                     | 4.44 | 9.87E-06 |
| SO_2970 | Lambda phage uncharacterized protein                     | 4.39 | 2.04E-05 |
| SO_2971 | Lambda phage holin S                                     | 4.59 | 1.07E-05 |
| SO_2972 | Lambda phage uncharacterized protein                     | 4.33 | 2.77E-05 |
| SO_2973 | Lambda phage lysozyme R                                  | 4.53 | 1.97E-05 |
| SO_2974 | Lambda phage pyridoxal phosphate dependent enzyme        | 4.44 | 3.19E-05 |
| SO_2976 | Lambda phage uncharacterized protein                     | 1.66 | 2.44E-04 |
| SO_2977 | Lambda phage uncharacterized protein                     | 1.51 | 1.48E-03 |
| SO_2978 | Lambda phage integrase                                   | 2.25 | 6.01E-05 |
| SO_2979 | Lambda phage uncharacterized protein                     | 2.51 | 9.57E-06 |
| SO_2981 | Lambda phage uncharacterized protein                     | 1.96 | 3.33E-04 |

|         |                                                                                            |      |          |
|---------|--------------------------------------------------------------------------------------------|------|----------|
| SO_2982 | Lambda phage uncharacterized protein                                                       | 1.74 | 4.99E-04 |
| SO_2983 | Lambda phage uncharacterized protein                                                       | 2.31 | 1.48E-04 |
| SO_2984 | Lambda phage replication protein P                                                         | 1.89 | 1.77E-04 |
| SO_2985 | Lambda phage replication protein O                                                         | 1.50 | 5.53E-04 |
| SO_2986 | Lambda phage uncharacterized protein                                                       | 1.82 | 6.99E-04 |
| SO_2987 | Lambda phage uncharacterized protein                                                       | 1.76 | 1.81E-03 |
| SO_2988 | Lambda phage phage regulatory protein CII                                                  | 2.40 | 4.84E-05 |
| SO_2989 | Lambda phage transcriptional repressor of early genes Cro                                  | 2.33 | 9.17E-05 |
| SO_2993 | Lambda phage type II DNA modification methyltransferase                                    | 2.20 | 1.80E-04 |
| SO_2997 | Lambda phage uncharacterized protein                                                       | 1.22 | 4.85E-03 |
| SO_3000 | Lambda phage uncharacterized protein                                                       | 1.55 | 1.02E-04 |
| SO_3001 | Lambda phage uncharacterized protein                                                       | 1.62 | 1.67E-04 |
| SO_3002 | Lambda phage uncharacterized protein                                                       | 1.62 | 2.14E-04 |
| SO_3003 | Lambda phage uncharacterized protein                                                       | 1.48 | 1.24E-04 |
| SO_3004 | Lambda phage type II restriction-modification system DNA N-6-adenine-methyltransferase Dam | 1.81 | 3.99E-05 |
| SO_3005 | Lambda phage uncharacterized protein                                                       | 1.61 | 3.05E-04 |
| SO_3006 | Lambda phage type II restriction modification system cytosine-5 DNA methyltransferase Dcm  | 1.72 | 5.29E-05 |
| SO_3010 | Lambda phage uncharacterized protein                                                       | 1.23 | 7.90E-03 |
| SO_3012 | Lambda phage DNA excisionase Xis                                                           | 1.33 | 1.66E-04 |
| SO_3025 | Periplasmic siderophore cleavage esterase IroE family                                      | 2.90 | 1.30E-09 |
| SO_3030 | Putrescine monooxygenase PubA                                                              | 6.39 | 3.14E-09 |
| SO_3031 | N-hydroxyputrescine-succinyl CoA transferase PubB                                          | 6.33 | 6.20E-10 |
| SO_3032 | NTP-dependent putrebactin synthetase PubC                                                  | 6.20 | 3.47E-10 |
| SO_3033 | TonB-dependent ferric putrebactin siderophore receptor PutA                                | 6.12 | 3.44E-10 |
| SO_3034 | Ferric putrebactin reductase PutB                                                          | 6.08 | 9.47E-10 |
| SO_3061 | DNA topoisomerase III TopB                                                                 | 1.40 | 1.35E-05 |
| SO_3062 | Predicted inner membrane protein                                                           | 5.86 | 3.47E-10 |
| SO_3063 | Alanine or glycine:cation symporter, AGCS family                                           | 4.35 | 2.42E-10 |
| SO_3087 | Predicted membrane protein                                                                 | 1.19 | 1.12E-05 |
| SO_3108 | Bifunctional 13-dimethyluroporphyrinogen III dehydrogenase/siroheme ferrochelata           | 1.05 | 1.88E-03 |
| SO_3119 | Hypothetical protein                                                                       | 1.04 | 1.30E-05 |
| SO_3333 | Periplasmic substrate binding protein family 1                                             | 1.07 | 2.12E-06 |
| SO_3343 | Predicted lipoprotein                                                                      | 1.08 | 1.44E-06 |
| SO_3344 | Predicted inner membrane protein                                                           | 5.14 | 8.71E-07 |
| SO_3370 | UPF0312 family alkali-inducible periplasmic protein YceI                                   | 2.64 | 3.59E-06 |

## Supplementary Material

|         |                                                                                    |      |          |
|---------|------------------------------------------------------------------------------------|------|----------|
| SO_3371 | Cytochrome B561 YceJ                                                               | 2.41 | 4.10E-05 |
| SO_3373 | Hypothetical protein                                                               | 1.52 | 2.77E-05 |
| SO_3392 | NAD(P)H:flavin oxidoreductase Sye4                                                 | 1.39 | 5.14E-03 |
| SO_3406 | Putative siderophore transporter component 1                                       | 2.68 | 1.20E-06 |
| SO_3407 | Putative siderophore transporter component 2                                       | 3.10 | 3.35E-07 |
| SO_3408 | Putative siderophore transporter component 3                                       | 3.06 | 6.20E-10 |
| SO_3430 | Recombination protein RecA                                                         | 1.34 | 5.44E-08 |
| SO_3462 | DNA repair protein RecN                                                            | 1.91 | 3.97E-07 |
| SO_3577 | Stress-induced multi-chaperone system component ClpB                               | 1.17 | 1.27E-02 |
| SO_3583 | 16S rRNA pseudouridine516 synthase                                                 | 2.95 | 1.30E-09 |
| SO_3584 | Superoxide-responsive transcriptional repressor of superoxide stress response AzrR | 3.00 | 7.63E-10 |
| SO_3585 | NADPH-dependent azoreductase Azr                                                   | 6.61 | 6.21E-09 |
| SO_3586 | Glyoxalase family protein                                                          | 5.96 | 1.30E-09 |
| SO_3587 | Hypothetical protein                                                               | 4.79 | 6.67E-10 |
| SO_3665 | ABC-type multidrug efflux system bifunctional ATPase and permease component        | 2.42 | 4.19E-08 |
| SO_3667 | Heme iron utilization protein HmuZ                                                 | 6.23 | 1.77E-08 |
| SO_3668 | Heme iron utilization protein HmuX                                                 | 6.21 | 1.30E-09 |
| SO_3669 | Hemoglobin/transferrin/lactoferrin receptor protein HmuA                           | 6.28 | 2.66E-08 |
| SO_3670 | Periplasmic protein TonB                                                           | 5.41 | 1.14E-07 |
| SO_3671 | TonB1 energy transduction system for heme uptake inner membrane component ExbB     | 6.00 | 7.56E-08 |
| SO_3672 | TonB1 energy transduction system for heme uptake inner membrane component ExbD     | 5.85 | 4.09E-08 |
| SO_3673 | Iron complex transport system substrate-binding protein HmuB                       | 6.15 | 1.01E-08 |
| SO_3674 | Iron complex transport system permease protein HmuC                                | 5.46 | 3.67E-10 |
| SO_3675 | Iron complex transport system ATP-binding protein HmuD                             | 5.98 | 3.44E-10 |
| SO_3676 | Protein of unknown function                                                        | 3.01 | 3.44E-10 |
| SO_3716 | DnaJ domain protein                                                                | 1.02 | 1.98E-05 |
| SO_3723 | Adenylyl-sulfate kinase                                                            | 1.71 | 4.20E-02 |
| SO_3724 | Pseudogene                                                                         | 1.63 | 4.58E-02 |
| SO_3726 | Sulfate adenylyltransferase large subunit CysN                                     | 1.59 | 4.13E-02 |
| SO_3727 | Sulfate adenylyltransferase small subunit CysD                                     | 1.68 | 2.92E-02 |
| SO_3728 | Uroporphyrin-III C-methyltransferase CysG                                          | 1.78 | 3.78E-02 |
| SO_3888 | Uncharacterized protein                                                            | 1.67 | 2.60E-08 |
| SO_3913 | Fur regulated PKHD-type hydroxylase PiuC                                           | 3.92 | 6.21E-09 |
| SO_3914 | TonB dependent receptor                                                            | 4.79 | 1.01E-08 |

|         |                                                                                       |      |          |
|---------|---------------------------------------------------------------------------------------|------|----------|
| SO_3915 | cheX; chemotaxis signal transduction system CheY dephosphorylase<br>CheX              | 1.46 | 2.38E-06 |
| SO_4303 | ATPase family protein associated with various cellular activities                     | 1.15 | 9.34E-05 |
| SO_4317 | Biofilm-promoting protein BpfA                                                        | 1.01 | 2.96E-05 |
| SO_4396 | FMN-dependent NADH-azoreductase AzoR                                                  | 1.22 | 1.87E-06 |
| SO_4446 | ABC-type molybdate uptake system ATPase component ModC                                | 1.01 | 1.26E-05 |
| SO_4474 | Pseudogene                                                                            | 1.12 | 2.38E-06 |
| SO_4477 | Two-component system, OmpR family, response regulator CpxR                            | 1.29 | 9.87E-08 |
| SO_4478 | Two-component system, OmpR family, sensor histidine kinase CpxA                       | 1.20 | 1.54E-07 |
| SO_4480 | NAD <sup>+</sup> -dependent acetaldehyde dehydrogenase ExaC                           | 1.81 | 7.12E-06 |
| SO_4492 | Protein of unknown function                                                           | 1.23 | 1.62E-02 |
| SO_4516 | TonB-dependent siderophore receptor                                                   | 5.20 | 3.44E-10 |
| SO_4523 | Iron-responsive TonB-dependent enterobactin receptor IrgA                             | 5.57 | 2.14E-07 |
| SO_4524 | Transcriptional regulator LysR family                                                 | 2.76 | 8.71E-07 |
| SO_4558 | Hypothetical protein                                                                  | 2.14 | 6.67E-10 |
| SO_4564 | TonB mediated energy transduction system energy transducer<br>component TonB          | 1.49 | 1.40E-05 |
| SO_4603 | Bifunctional transcriptional repressor of SOS-response/self-cleaving<br>protease LexA | 1.86 | 2.33E-07 |
| SO_4604 | Cell division inhibitor Sula                                                          | 1.92 | 2.97E-07 |
| SO_4606 | aa3-type cytochrome c oxidase subunit II CoxB                                         | 1.35 | 1.68E-05 |
| SO_4627 | Glutamine rich protein                                                                | 1.96 | 4.47E-08 |
| SO_4650 | Alpha/beta hydrolase family of unknown function                                       | 2.52 | 9.87E-03 |
| SO_4651 | Protein of unknown function                                                           | 2.11 | 1.47E-02 |
| SO_4652 | ABC-type sulfate/thiosulfate uptakesystem substrate-binding subunit<br>Sbp            | 3.02 | 4.86E-03 |
| SO_4653 | ABC-type sulfate/thiosulfate uptakesystem permease component 1<br>CysT                | 2.95 | 8.02E-03 |
| SO_4654 | ABC-type sulfate/thiosulfate uptakesystem permease component 2<br>CysW                | 2.39 | 1.62E-02 |
| SO_4655 | ABC-type sulfate/thiosulfate uptakesystem ATPase component CysA                       | 2.33 | 1.99E-02 |
| SO_4664 | Predicted membrane protein                                                            | 1.05 | 2.79E-04 |
| SO_4708 | Putative sulfate exporter (PSE) family protein                                        | 1.37 | 2.64E-02 |
| SO_4740 | Predicted membrane protein of unknown function                                        | 3.94 | 3.77E-07 |
| SO_4743 | Iron complex outermembrane receptor protein                                           | 1.89 | 1.92E-05 |
| SO_4782 | Protein with c-terminal DUF1078 domain                                                | 1.53 | 5.32E-08 |
| SO_4787 | Mu phage uncharacterized protein                                                      | 1.12 | 9.25E-03 |
| SO_4788 | Mu phage uncharacterized protein                                                      | 1.22 | 7.70E-03 |

Supplementary Material

|          |                                                                                 |      |          |
|----------|---------------------------------------------------------------------------------|------|----------|
| SO_4790  | Lambda phage uncharacterized protein                                            | 2.43 | 1.18E-05 |
| SO_4793  | Lambda phage uncharacterized protein                                            | 2.90 | 1.97E-04 |
| SO_4795  | Lambda phage uncharacterized protein                                            | 1.61 | 1.66E-04 |
| SO_4819  | Hypothetical protein                                                            | 3.53 | 1.80E-07 |
| SO_A0012 | SOS mutagenesis protein RulB                                                    | 1.71 | 3.33E-05 |
| SO_A0013 | SOS mutagenesis protein RulA                                                    | 1.91 | 2.07E-05 |
| SO_A0047 | Hypothetical protein                                                            | 1.57 | 4.10E-05 |
| SO_A0049 | Toxin secretion ABC transporter, ATP-binding subunit/permease protein, putative | 1.11 | 1.54E-04 |
| SO_A0099 | Hypothetical protein                                                            | 1.28 | 3.97E-07 |
| SO_A0176 | Hypothetical protein                                                            | 1.48 | 2.36E-03 |
| SO_A0177 | Bacteriocin-like peptide                                                        | 2.00 | 1.36E-05 |
| SO_A0178 | Bacteriocin-like peptide                                                        | 2.26 | 6.68E-06 |
| SO_A0181 | Pseudogene                                                                      | 1.20 | 4.12E-05 |
| SO_m007  | RyhB                                                                            | 1.35 | 2.01E-03 |

---
